# Supplementary material
Source: publisher site journal article supplement (https://static.cambridge.org/content/id/urn:cambridge.org:id:article:S1041610220001398/resource/name/S1041610220001398supp002.docx)
Supplement: Supplementary file 1 [file S1041610220001398supp002.docx]

**Supplementary Table 1 Preliminary study variables and corresponding latent variables**

| **Latent variables** | **Observational variables** |
| --- | --- |
| Sociodemographic characteristics | Gender, age, marital status, residence, educational level,  household consumption expenditure last year |
| Poor health status | Childhood health status, self-reported health status,  health status change compare to last year, ADL,  types of chronic diseases suffered, health status satisfaction |
| Unhealthy habits | Smoking status, Alcoholic beverages last year |
| Sleep duration | Average actual sleep hours per night last month,  Average duration per nap last month |
